# Supplementary material for: Subclasses of allergen-specific IgG: Serum IgG2 and IgG3 levels are not predicted by IgG1/IgG4 levels
Source: PubMed Central journal article supplement — Clin Exp Allergy. Author manuscript; Available in PMC 2022 Jun 27. (PMC9235034; doi:10.1111/cea.13977), 2021-07-20
Supplement: NIHMS1815150-supplement-Supplementary_Material.pdf [file NIHMS1815150-supplement-Supplementary_Material.pdf]

1

2

3

4 **Online Repository for IgG Subclass Distributions in Serum**

5

By

6

Donald MacGlashan, Jr.

7

Santiago Alvarez-Arango

8

Jody Tversky

9

10

Johns Hopkins University

11

Johns Hopkins Asthma and Allergy Center

12

5501 Hopkins Bayview Circle

13

Baltimore, MD 21224

14

15 *Subjects*

16 Subjects were recruited under three Johns Hopkins University IRB-approved  
17 protocols for serum collection. Initial collections were quasi-random and atopic  
18 history was ascertained solely by historical account of a physician diagnosis of  
19 allergies from the subjects, based on skin prick tests and including whether they had  
20 obtained some form of allergen immunotherapy. For the subjects who do not report  
21 "allergies" in general or to the two allergens examined by ELISA, there was no  
22 corroborating skin test data. A secondary group was recruited from the Johns  
23 Hopkins Allergy clinic prior to or after they had obtained subcutaneous allergen  
24 immunotherapy. Once again, subject atopy was confirmed by skin prick test data.  
25 Serum was obtained from blood samples after clotting and stored at -80°C.

26 *ELISA construction*

27 ELISA plates Nunc MaxiSorp flat bottom plates were coated overnight at room  
28 temperature with allergen solutions. Only mixed allergens were used. Lyophilized  
29 Short Ragweed (Greer Laboratories) was diluted to a concentration of 4 µg/ml in  
30 PBS and 0.3 ml loaded into each well of the plate. The plates were washed 5 times  
31 with PBS containing 0.02% Tween-20 and 0.1% BSA before adding samples or  
32 standards. Washing after overnight adsorption was followed by 10-15 minutes of  
33 blocking in washing buffer containing 0.1% BSA. Dermatophagoides farinae (Df)  
34 and Dermatophagoides pteronyssinus (Dp) from Allermed (10,000 BAU/ml stock in  
35 50% glycerin) were coated as a mixture, each at 5 BAU/ml final concentration in  
36 PBS. Human serum albumin was coated at 2 µg/ml in PBS for the pilot experiments

37 to determine nonspecific binding. Standards and serum samples were incubated in  
38 the plates for 1 hour at room temperature in PBS + 0.02% Tween-20 and 0.1% BSA.  
39 Typically 1/20 and 1/100 dilutions of the serum samples were added to the assay  
40 wells. After 4 washes with PBS/0.02% Tween-20, anti-subclass antibodies (anti-  
41 IgG1, HP6070P; anti-IgG2, HP6002P; anti-IgG3, HP6047P; anti-IgG4, HP6023P,  
42 diluted in PBS/0.02% Tween-20) were added at concentrations of 10 µg/ml, 4  
43 µg/ml, 6 ng/ml and 1 µg/ml, respectively (see next section for calibration choices).  
44 After a one-hour incubation at room temperature and 4 washes, a 1/4000 dilution  
45 of anti-mouse IgG-HRP (Amersham, Inc.) was added for a one-hour incubation at  
46 room temperature. After 5 washes, TMB solution was added and the reaction  
47 stopped with 1M H<sub>2</sub>SO<sub>4</sub>.

48 In pilot experiments, nonspecific binding in this ELISA format (with serum present  
49 in the first incubation) was assessed by comparing binding in wells coated with HSA  
50 or coated with ragweed. For the IgG1, 2 and 4 subclasses, nonspecific binding to HSA  
51 was less than 1-5% and about 7% for IgG3. Sera were also adsorbed with sepharose  
52 beads coupled to either HSA or ragweed (CNBr-enabled coupling) and retested in  
53 the ELISA; approximately 90% of the signal was lost by adsorption with ragweed-  
54 beads and not with HSA-beads. In addition, dilution studies of test sera  
55 demonstrated that there was not an indication that one antibody subclass could  
56 block access by other subclasses, notably, that antigen-specific IgG1 was not  
57 overwhelming the ability of lower concentrations of IgG3 or IgG4 to be detected.

58 *Cross-calibration of anti-subclass antibodies*

59 The transfectoma series of subclass antibodies (IgG1, IgG2, IgG3, IgG4) [1] specific  
60 for a p-nitrophenyl ligand were used to cross-calibrate the anti-subclass antibodies.  
61 Pilot studies calibrated these transfectoma antibodies with a total IgG ELISA where  
62 the detection antibody was the WHO Ab 6045P [2]. Human IgG (ICN Laboratories)  
63 was used as the standard. With equal concentrations of the transfectoma subclass  
64 antibodies incubated on a plate, the anti-subclass antibodies were titrated to  
65 generate similar optical densities in the final reading. This balancing resulted in the  
66 concentrations of the anti-subclass antibodies used above (10 µg/ml, 4 µg/ml, 6  
67 ng/ml, and 1 µg/ml for anti-IgG1, HP6070P; anti-IgG2, HP6002P; anti-IgG3,  
68 HP6047P; anti-IgG4, HP6023P, respectively).

69 For absolute calibration, on a single plate, one-third was loaded with ragweed (4  
70 µg/ml in PBS), a third loaded with NP(7)-BSA (10 µg/ml in PBS) and a third loaded  
71 with equal mixture of D.P and D.F. dust mite allergens described above. For the  
72 ragweed portion, the serum standard was loaded at a range of concentrations while  
73 for the portion adsorbed to NP-BSA, anti-NP specific IgG1, IgG2, IgG3 or IgG4 was  
74 loaded at 15 ng/ml (for each subclass) and in the portion adsorbed to dust-mite, the  
75 chosen serum standard for dust-mite assays. After a one-hour incubation and  
76 washing, anti-subclass antibodies (see above) were incubated for 1 hour at room  
77 temperature. After washing, the wells were incubated with anti-mouse HRP  
78 antibody for 1 one-hour at room temperature. After washing, TMB solution was  
79 added and the color reaction stopped with 1M H<sub>2</sub>SO<sub>4</sub>. From the titration curves for a  
80 serum standard and subclass antibodies, equivalence (equal optical density) was  
81 calculated for the serum standard. These results allowed the absolute

82 concentrations of anti-ragweed subclass antibody to be determined and cross-  
83 calibrated the ragweed and dust mite standards for each subclass.

84

## 85 **References**

- 86 1. Bruggemann M, Williams GT, Bindon CI, et al. (1987) Comparison of the effector  
87 functions of human immunoglobulins using a matched set of chimeric  
88 antibodies. *Journal of Experimental Medicine* 166, 1351-61.
- 89 2. MacGlashan D, Jr., Hamilton RG. (2016) Parameters determining the efficacy of  
90 CD32 to inhibit activation of FcepsilonRI in human basophils. *J Allergy Clin*  
91 *Immunol* 137, 1256-8 e1-11.

92

93

94

95

96
